# Supplementary material for: Improving diagnostic precision, care and syndrome definitions using comprehensive next-generation sequencing for the inherited bone marrow failure syndromes
Source: HighWire-hosted journal article supplement (doi:10.1136/jmedgenet-2015-103270), 2015-07-01
Supplement: jmedgenet-2015-103270supp.pdf [file jmedgenet-2015-103270supp.pdf]

# Supplemental Figures

**Improving diagnostic precision, care and syndrome definitions using comprehensive next generation sequencing for the inherited bone marrow failure syndromes**

Ibrahim Ghemlas, Hongbing Li, Bozana Zlateska, Robert Klaassen, Conrad V Fernandez, Rochelle A Yanofsky, John Wu, Yves Pastore, Mariana Silva, Jeff H Lipton, Josse Brossard, Michon Bruno, Sharon Abish, MaCregor Steele, Roona Sinha, Mark Belltrutti, Vicky Breaky, Lawrence Jardine, Lisa Goodyear, Lillian Sung, Santhosh Dhanraj, Emma Reble, Amanda Wagner, Joseph Beyene, Peter Ray, Stephen Meyn, Michaela Cada, Yigal Dror

**Figures 1-58 show the mutation areas from the next generation sequencing BAM files and information about Sanger sequencing validation. Please note that in the BAM files only a proportion of the reads are shown (about 7-8 of an average of 680 reads/patient).**

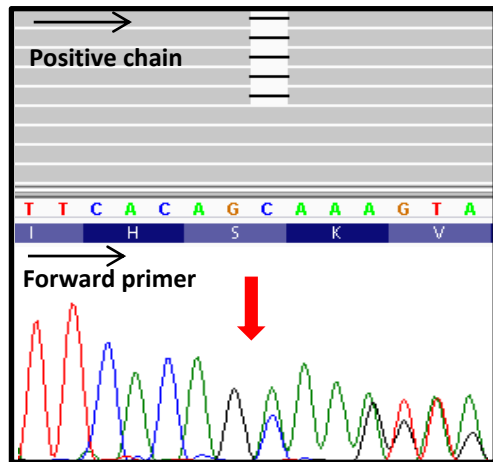

1. Patient 1 in Supplemental Table 3.  
*RPS26* c.243delC

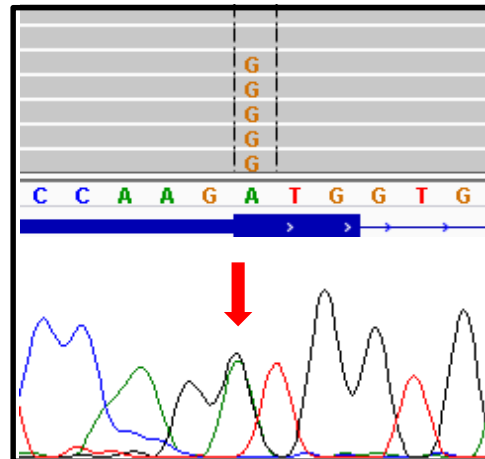

2. Patient 2 in Supplemental Table 3.  
*RPS26* c.1A>G

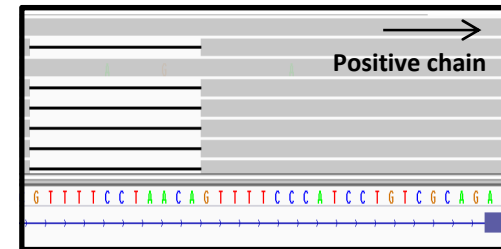

3. Patient 3 in Supplemental Table 3.  
*RPS26* c.4-32\_21delGTTTTTCCTAACA  
 (Mutation was Validated in a clinical lab)

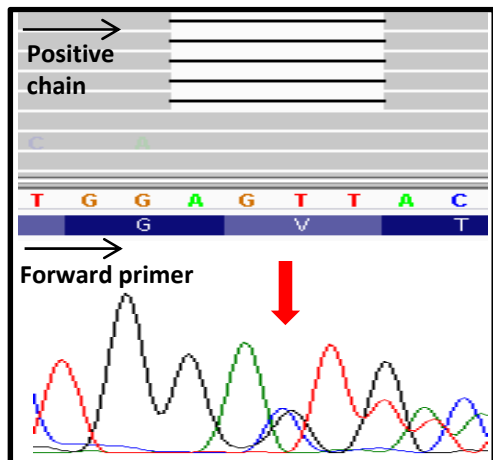

4. Patient 4 in Supplemental Table 3.  
*RPS19* c.10\_13delAGTT

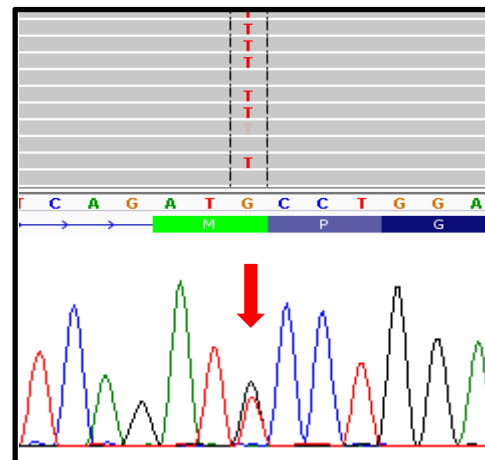

5. Patient 5 in Supplemental Table 3.  
*RPS19* c.3G>T

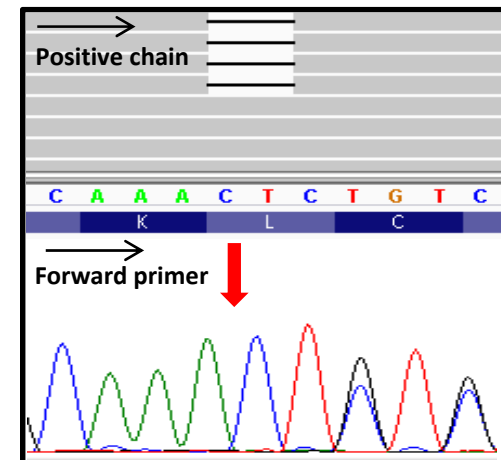

6. Patient 1 in Supplemental Table 3.  
*RPL11* c.60\_61delCT

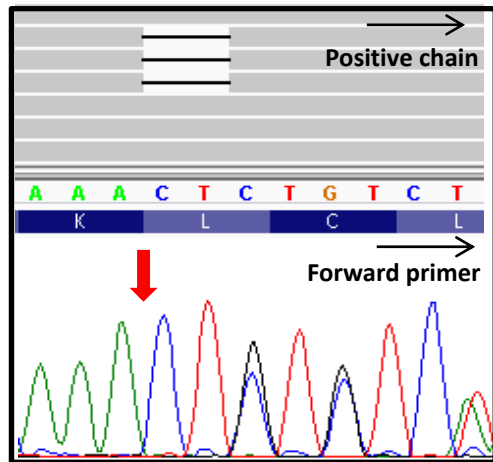

7. Patient 7 in Supplemental Table 3.  
*RPL11* c.60\_61delCT

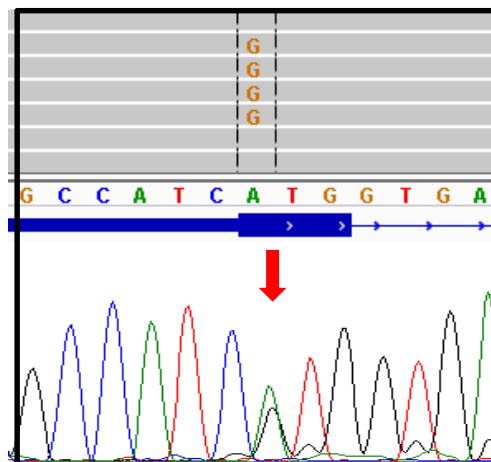

8. Patient 8 in Supplemental Table 3.  
*RPS24* c.1A>G

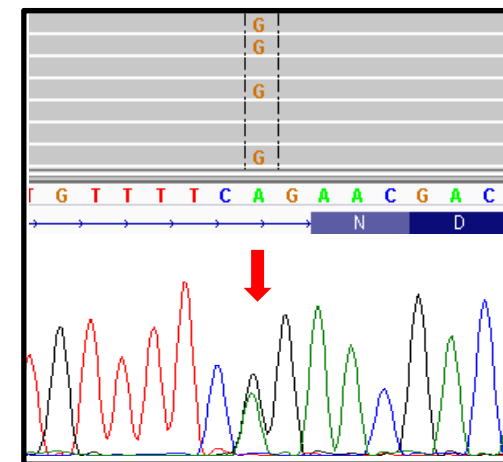

9. Patient 9 in Supplemental Table 3.  
*RPS24* c.4-2A>G

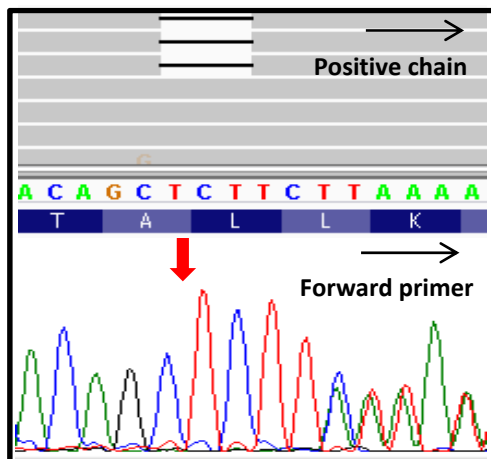

10. Patient 10 in Supplemental Table 3.  
*RPL35A* c.78\_80delTCT

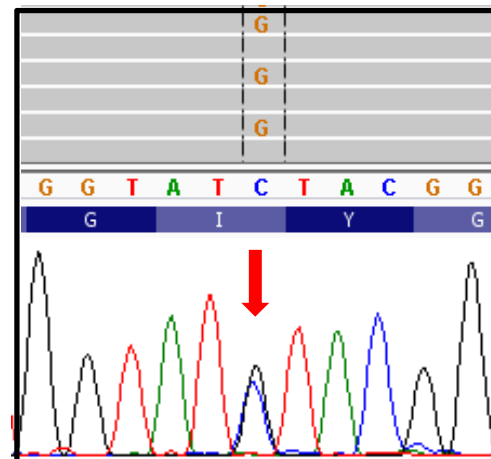

11. Patient 11 in Supplemental Table 3.  
*RPL11* c.372C>G

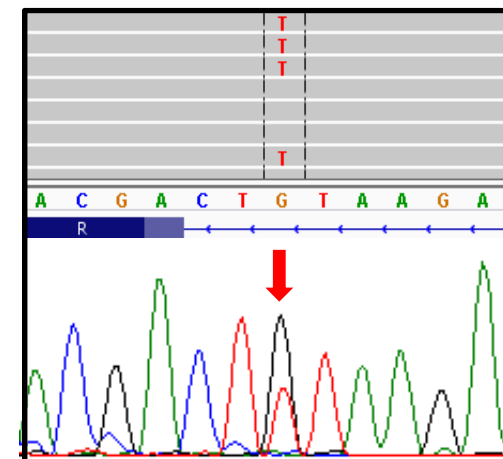

12. Patient 12 in Supplemental Table 3.  
*RPS29* c.63-3C>A

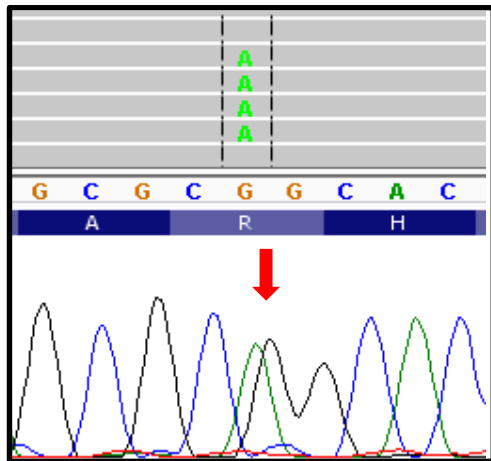

**13.** Patient 13 in Supplemental Table 3.  
*RPS19* c.185G>A

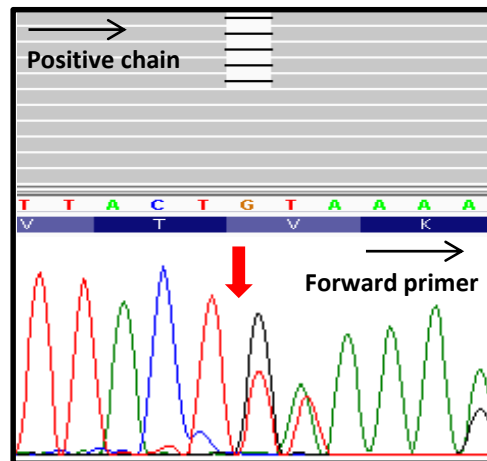

**14.** Patient 14 in Supplemental Table 3.  
*RPS19* c.16delG

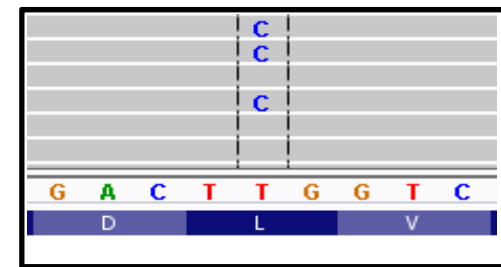

**15.** Patient 15 in Supplemental Table 3.  
*RPS7* c.398T>C. (Mutation was  
Validated in a clinical lab )

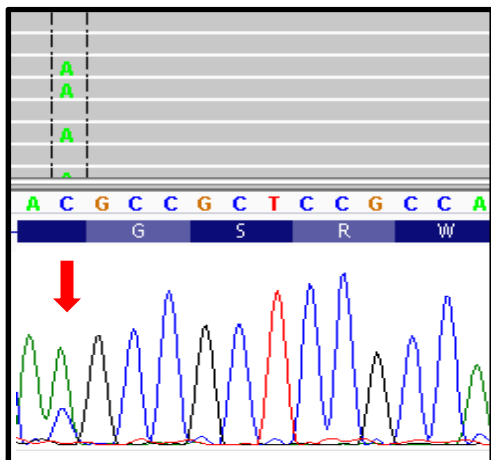

**16a.** Patient 16 in Supplemental Table 3.  
*SBDS* c.127G>T

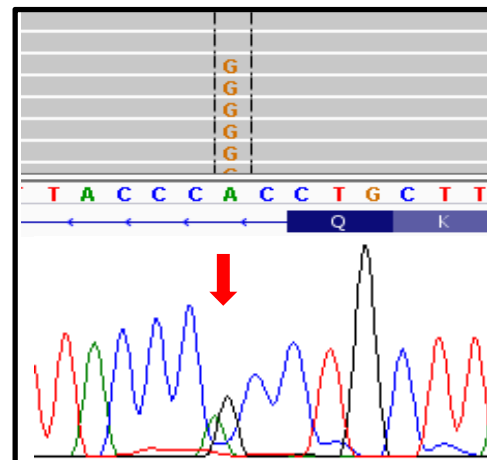

**16b.** Patient 16 in Supplemental Table 3.  
*SBDS* c.258+2T>C

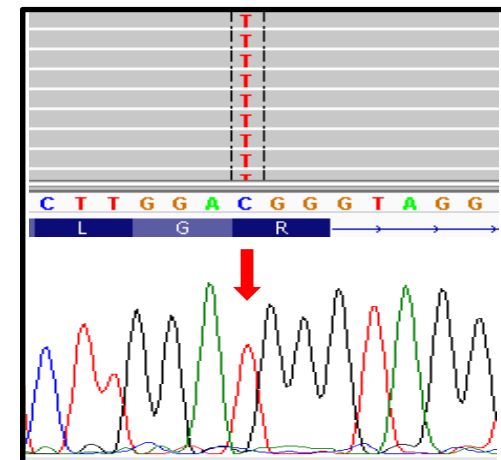

**17.** Patient 17 in Supplemental Table 3.  
*FANCE* c.1111C>T (hom)

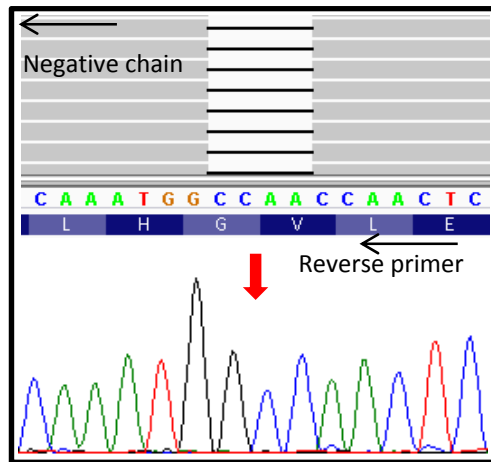

**18.** Patient 18 in Supplemental Table 3.  
*FANCA* c.1115\_1118delTTGG (hom)

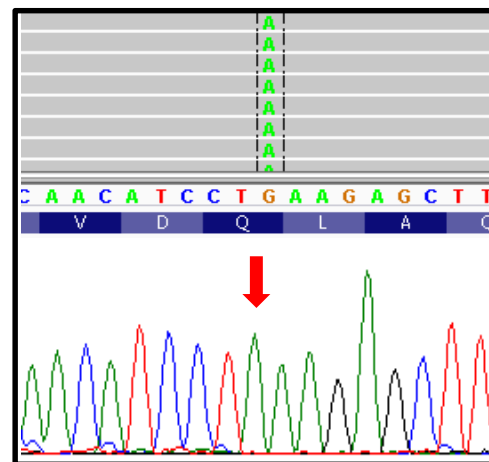

**19.** Patient 19 in Supplemental Table 3.  
*FANCA* c.1645C>T (hom)

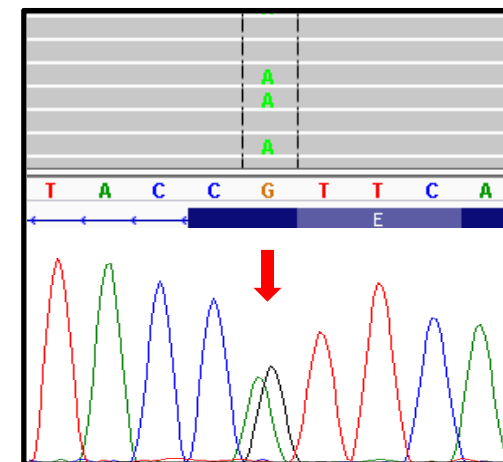

**20a.** Patient 20 in Supplemental Table 3.  
*FANCA* c.2851C>T

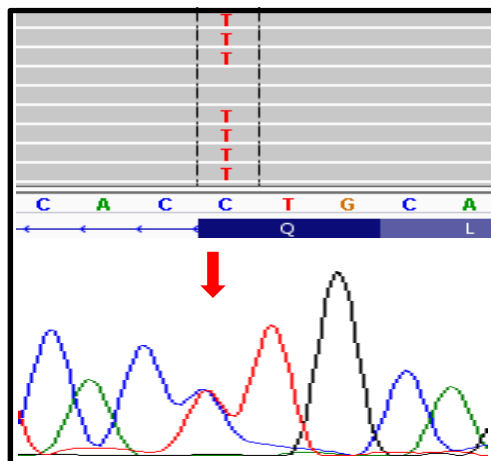

**20b.** Patient 20 in Supplemental Table 3.  
*FANCA* c.1470G>A

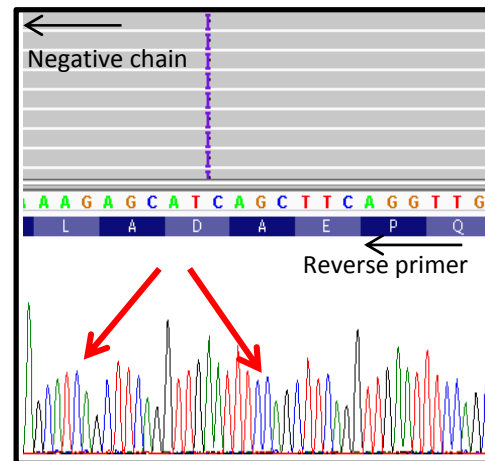

**21.** Patient 21 in Supplemental Table 3.  
*FANCA* c.2830\_2831InsGAAATTCAACCT  
GAAGCTG (hom)

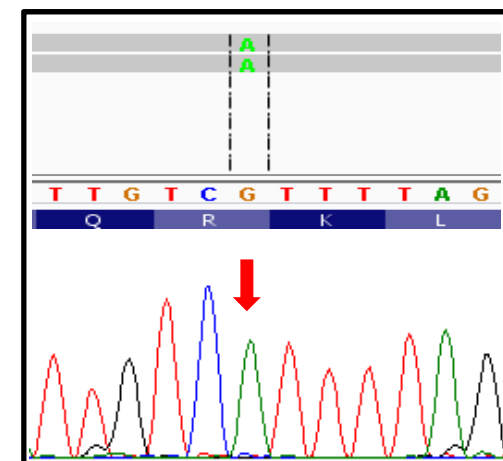

**22.** Patient 22 in Supplemental Table 3.  
*FANCI/BRIP1* c.2392C>T (hom). See Results  
Section for more information about this  
homozygous mutation with 2 reads .

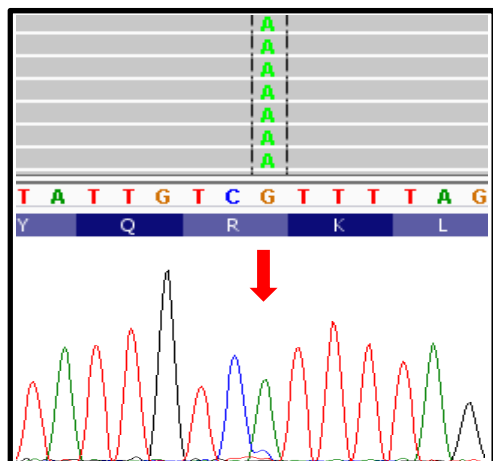

**23.** Patient 23 in Supplemental Table 3.  
*FANCI/BRIP1* c.2392C>T (hom)

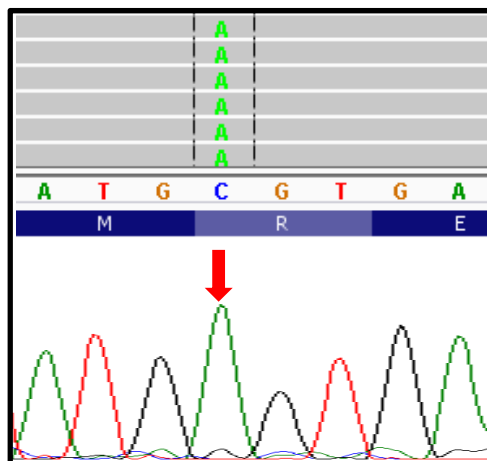

**24.** Patient 24 in Supplemental Table 3.  
*ERCC4* c.2065C>A (hom)

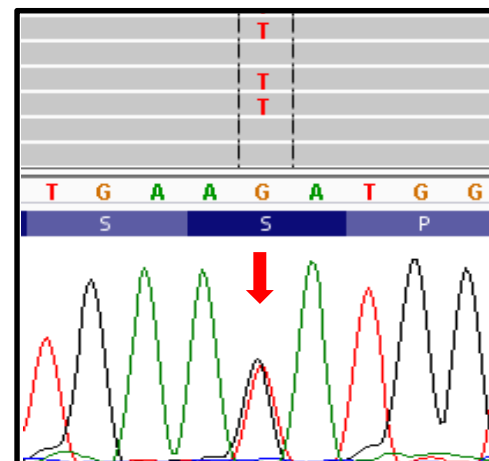

**25.** Patient 25 in Supplemental Table 3.  
*TINF2* c.734C>A

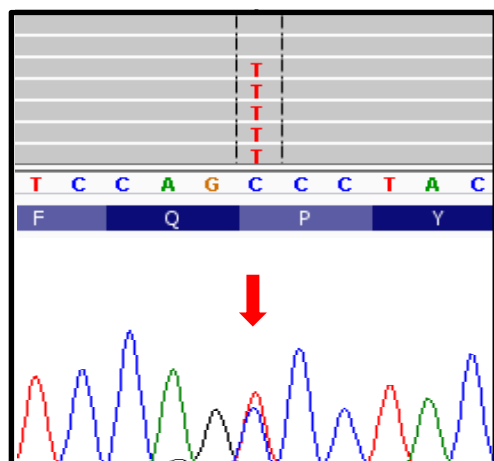

**26a.** Patient 26 in Supplemental Table 3.  
*RTEL1* c.49C>T

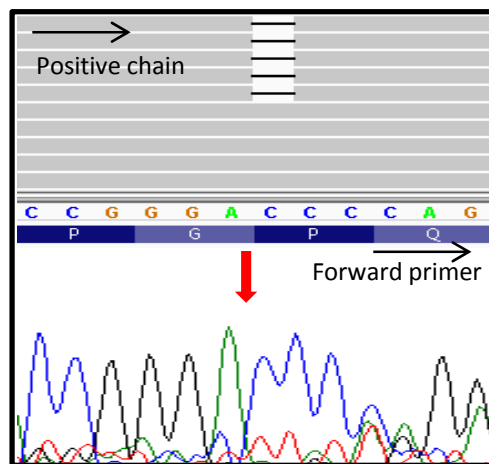

**26b.** Patient 26 in Supplemental Table 3.  
*RTEL1* c.3442delC

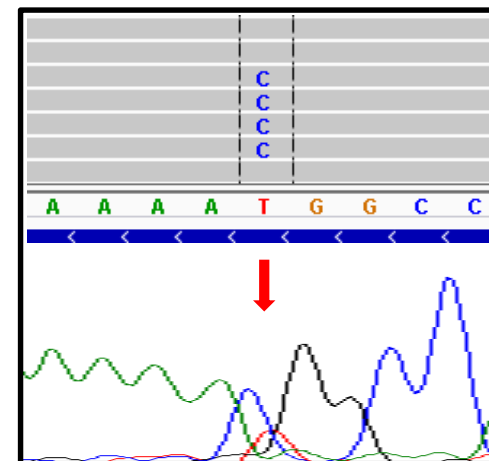

**27a.** Patient 27 in Supplemental Table 3.  
*TERC* c.37A>G

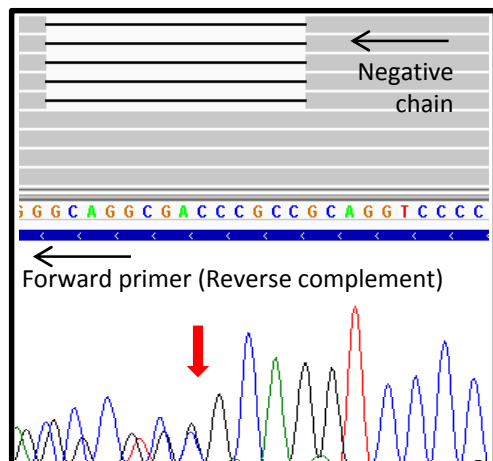

**27b.** Patient 27 in Supplemental Table 3.  
*TERC* c.216\_229del

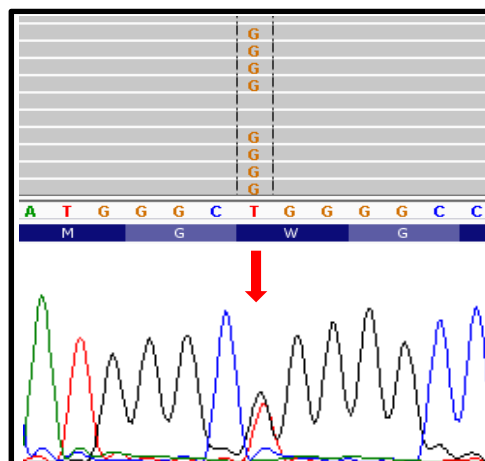

**28.** Patient 28 in Supplemental Table 3.  
*ELANE* c.466T>G

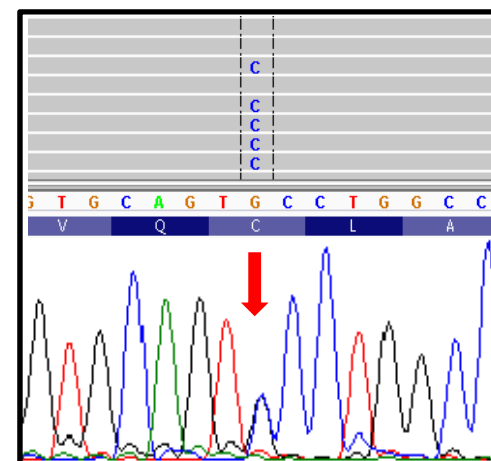

**29.** Patient 29 in Supplemental Table 3.  
*ELANE* c.452G>C

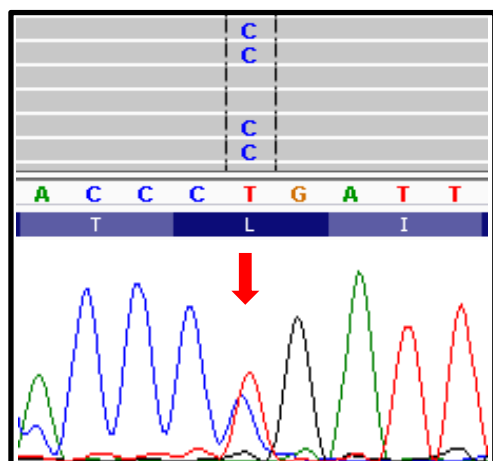

**30.** Patient 30 in Supplemental Table 3.  
*ELANE* c.176T>C

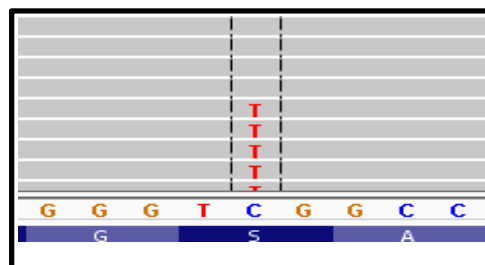

**31.** Patient 31 in Supplemental Table 3.  
*ELANE* c.377C>T (Mutation was  
Validated in a clinical lab )

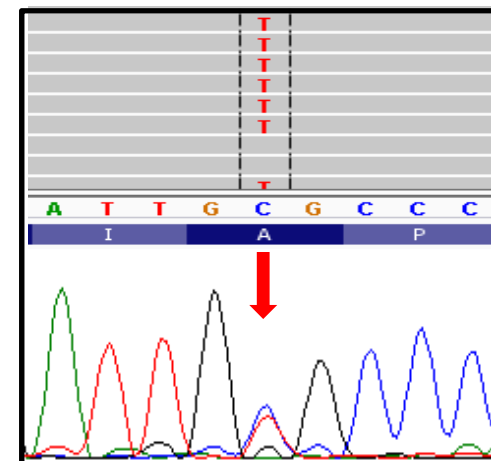

**32.** Patient 32 in Supplemental Table 3.  
*ELANE* c.182C>T

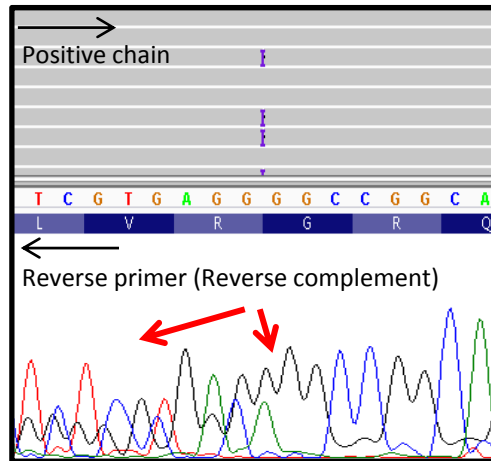

**33.** Patient 33 in Supplemental Table 3.  
*ELANE* c.574\_581dupGGCCGGCA

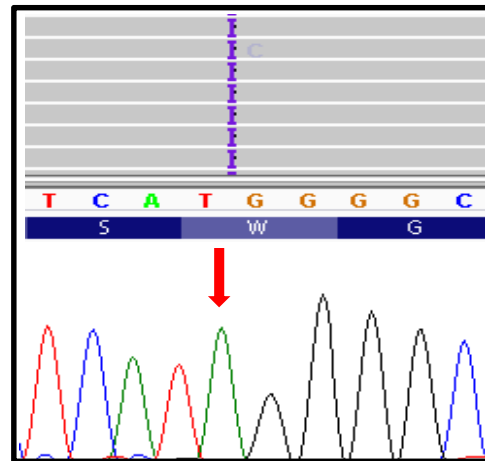

**34.** Patient 34 in Supplemental Table 3.  
*HAX1* c.131insA (hom)

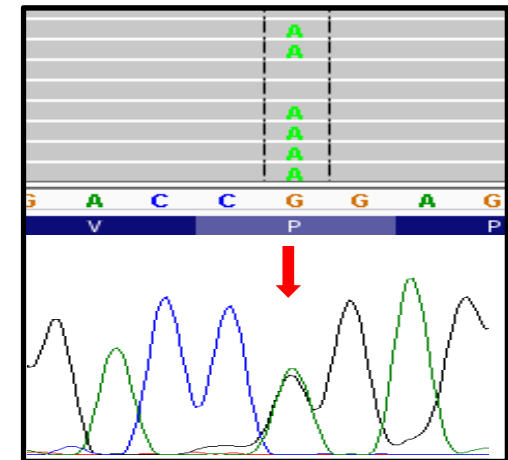

**35a.** Patient 35 in Supplemental Table 3.  
*CDAN1* c.2015C>T

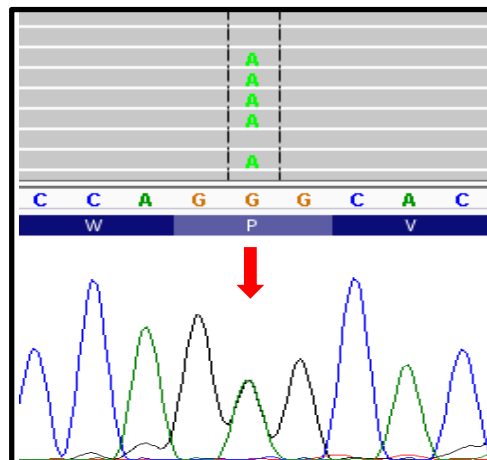

**35b.** Patient 35 in Supplemental Table 3.  
*CDAN1* c.2081C>T

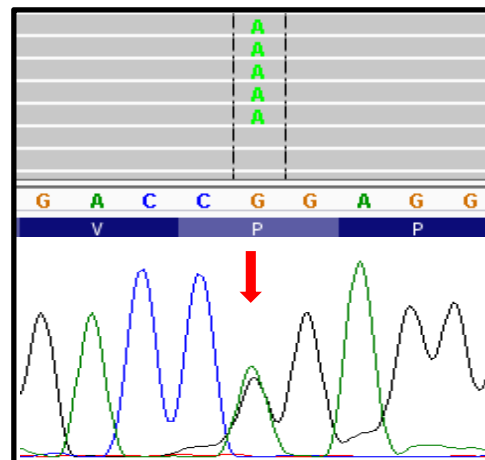

**36a.** Patient 36 in Supplemental Table 3.  
*CDAN1* c.2015C>T

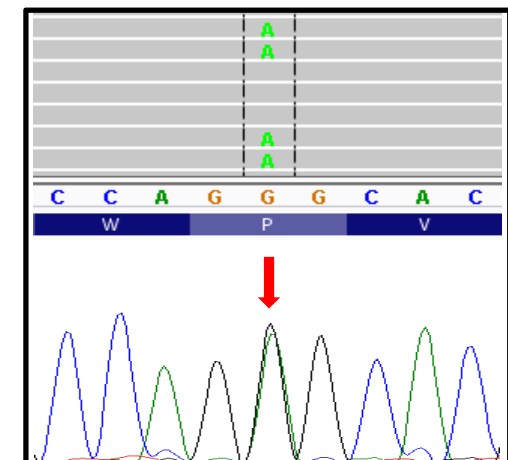

**36b.** Patient 36 in Supplemental Table 3.  
*CDAN1* c.2081C>T



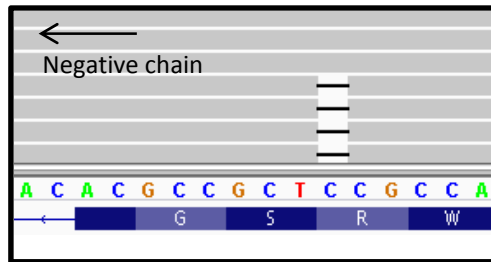

**37a.** Patient 37 in Supplemental Table 3. *SBDS* c.120delG (Mutation was Validated in a clinical lab )

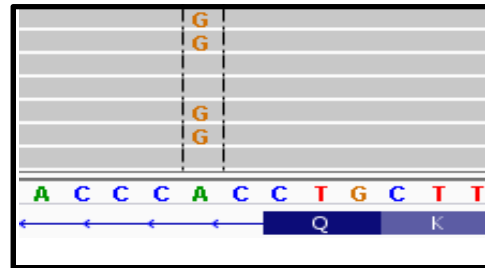

**37b.** Patient 37 in Supplemental Table 3. *SBDS* c.258+2T>C (Mutation was Validated in a clinical lab )

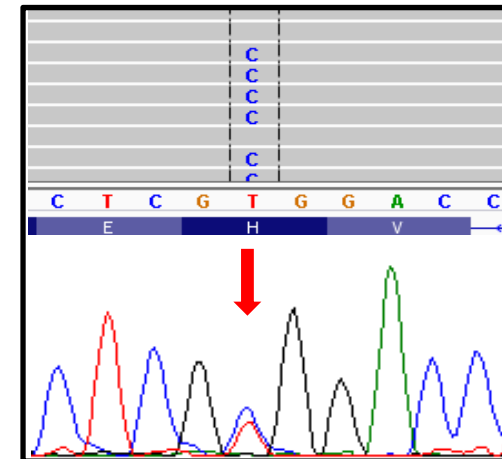

**38.** Patient 38 in Supplemental Table 3. *MYH9* c.4562A>G

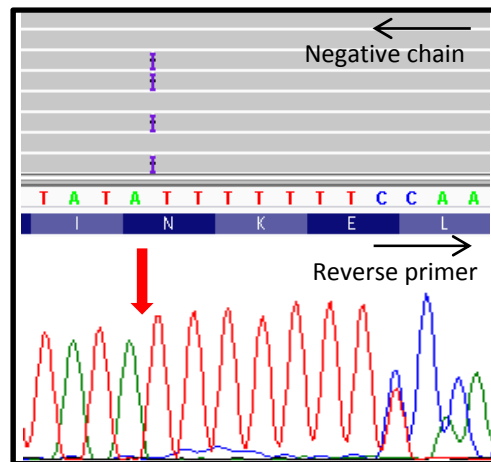

**39.** Patient 39 in Supplemental Table 3. *ANKRD26* c.4976dupA

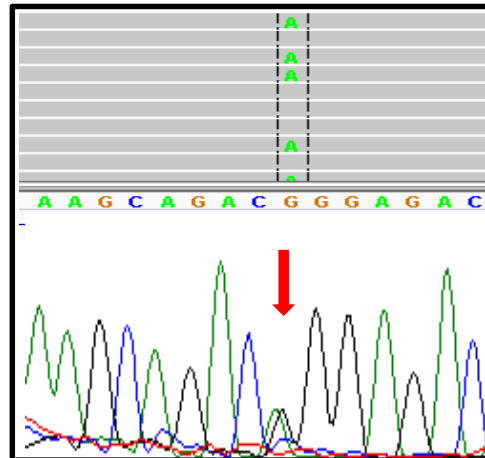

**40.** Patient 40 in Supplemental Table 3. *TERT* c.2383-15C>T. The NGS gene panel detected the same mutation in the affected mother of this patient (Supplemental Fig 3, Patient 42)

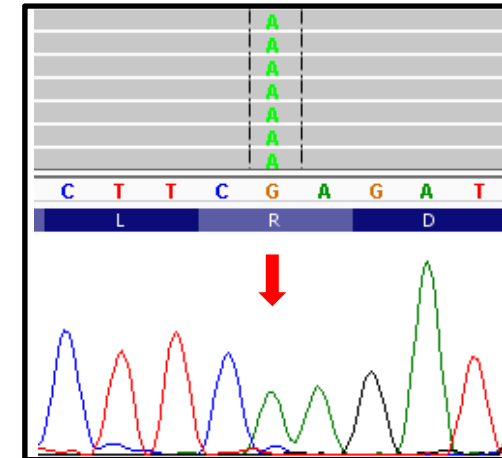

**41.** Patient 42 in in Supplemental Table 3. *SLC25A38* c.560G>A

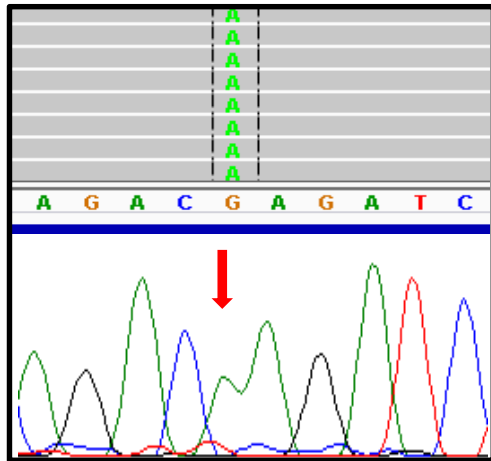

**42a.** Patient 43 in in Supplemental Table 3.  
*RBM8A* c.-21G>A (compound het)

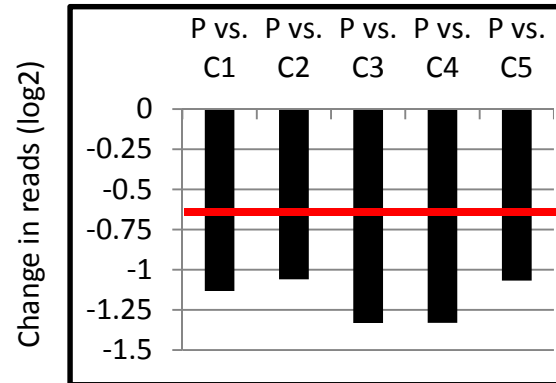

**42b.** Patient 43 in in Supplemental Table 3.  
*RBM8A* one copy number deletion as indicated by  $\log_2 < -0.6$  when patient calls are compared to controls (compound het) (C, control; P, patient.)

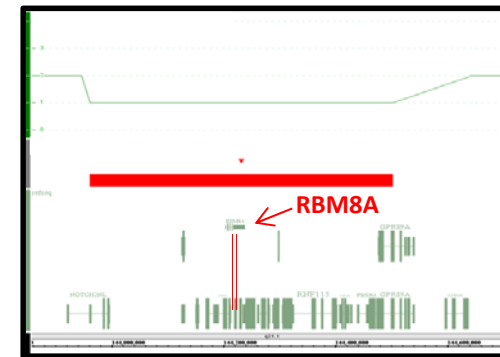

**42c.** Patient 43 in Supplemental Table 3.  
 One copy number deletion that included *RBM8A* was found by Affymetrix SNP6.0 array. The red arrow points to the location of *RBM8A*. The red vertical lines show its approximate borders .

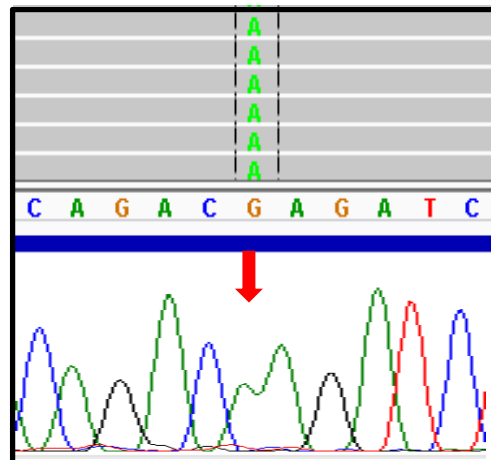

**43a.** Patient 44 in in Supplemental Table 3.  
*RBM8A* c.-21G>A (compound het)

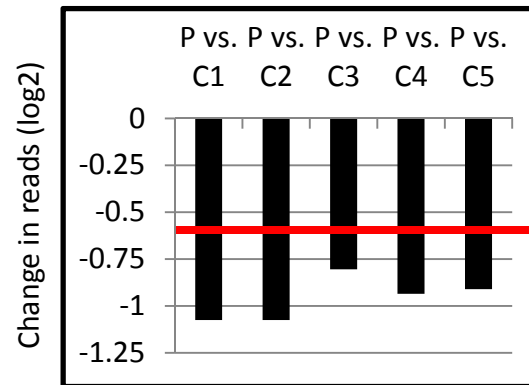

**43b.** Patient 44 in in Supplemental Table 3.  
*RBM8A* one copy deletion as indicated by  $\log_2 < -0.6$  when patient calls are compared to controls(compound het) (C, control; P, patient.)

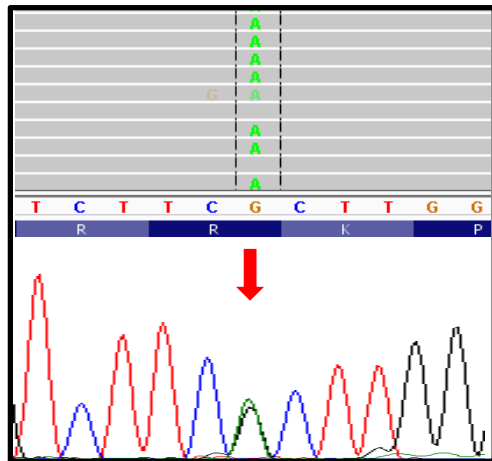

44. Patient 1 in Supplemental Table 4.  
GATA2 c.1009C>T

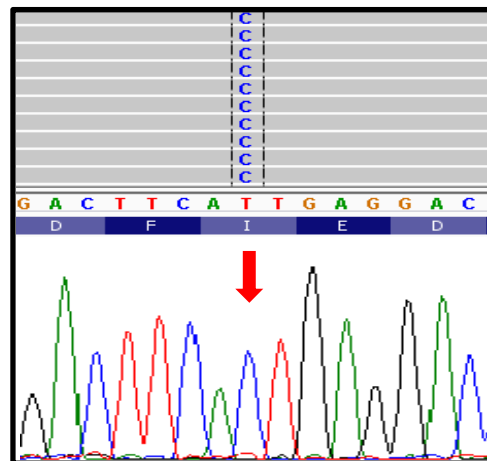

45. Patient 2 in Supplemental Table 4.  
WAS c.881T>C (hemizygous)

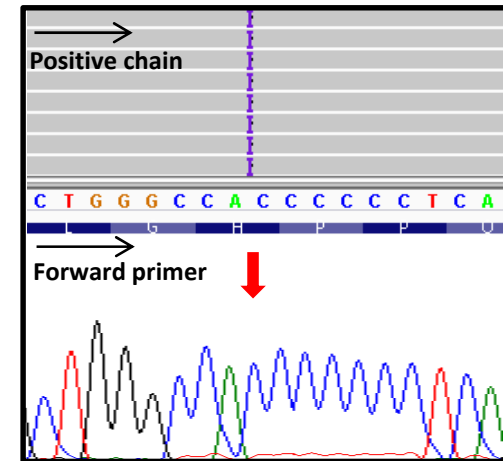

46. Patient 3 in Supplemental Table 4.  
G6PC3 c.911dupC (hom)

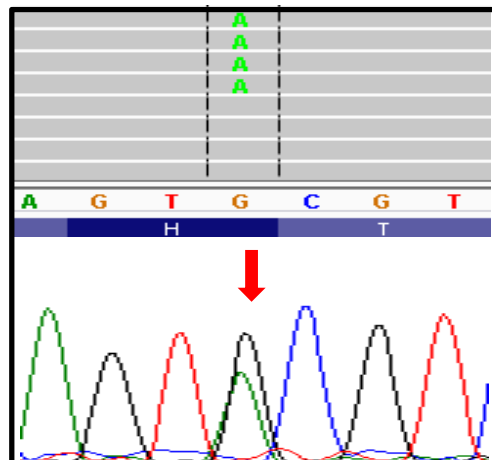

47. Patient 4 in Supplemental Table 4.  
TERT c.1234C>T

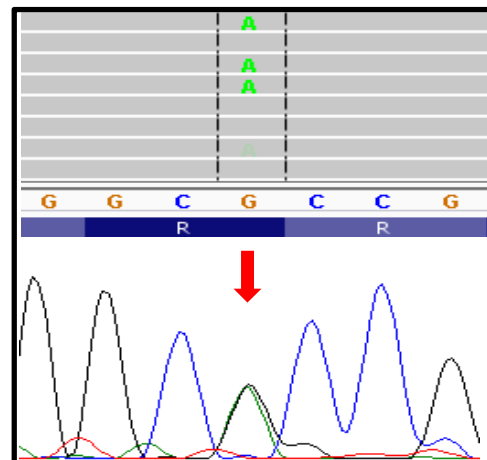

48. Patient 5 in Supplemental Table 4.  
TERT c.2014C>T

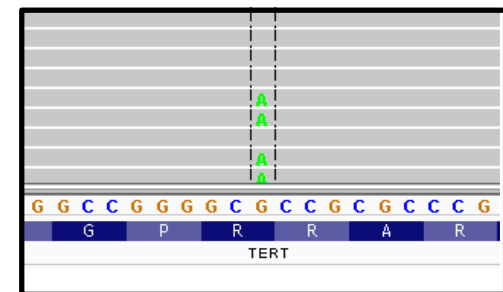

49. Patient 6 in Supplemental Table 4.  
TERT c.2014C>T (Mutation was  
Validated in a clinical lab )

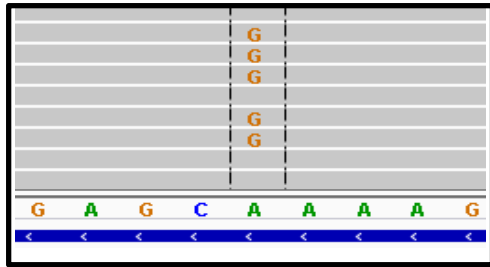

50. Patient 7 in Supplemental Table 4.  
*TERC* n.83T>C (Mutation was Validated in a clinical lab )

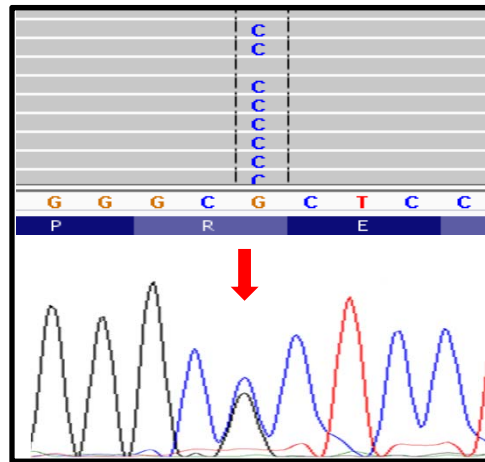

51. Patient 8 in Supplemental Table 4.  
*TINF2* c. 844C>G

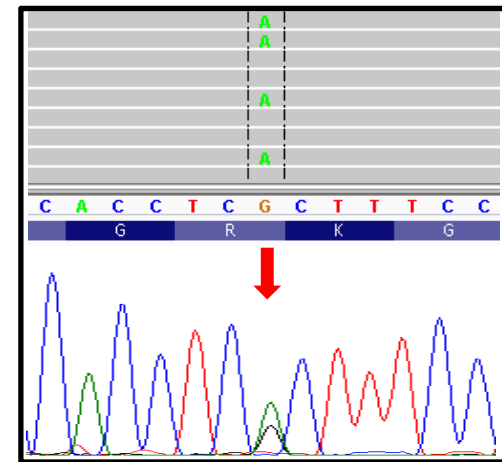

52. Patient 9 in Supplemental Table 4.  
*CXCR4* c.1000C>T

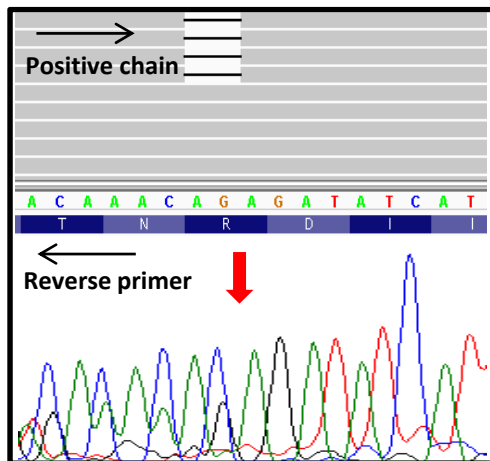

53. Patient 10 in Supplemental Table 4.  
*RPL5* c.174\_175delAG

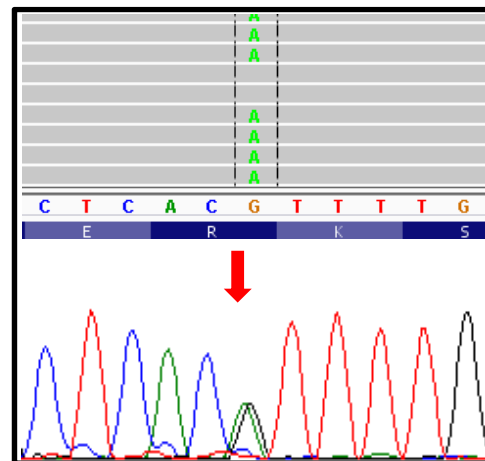

54. Patient 11 in Supplemental Table 4.  
*MYH9* c.3493C>T

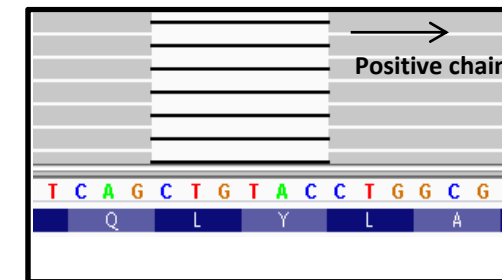

55. Patient 12 in Supplemental Table 4.  
*WAS* c.157\_162delCTGTAC (hemizygous)  
 (Mutation was Validated in a clinical lab )

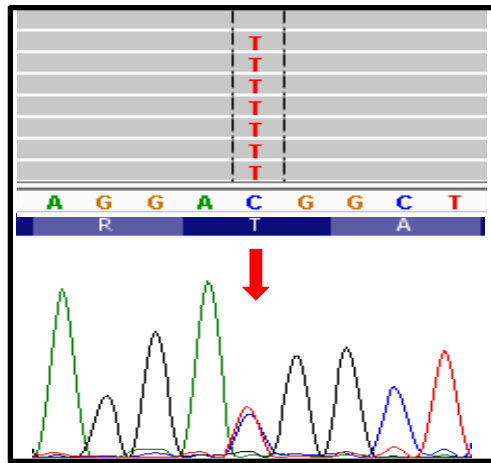

**56a.** Patient 13 in Supplemental Table 4.  
*RTEL1* c.1373C>T

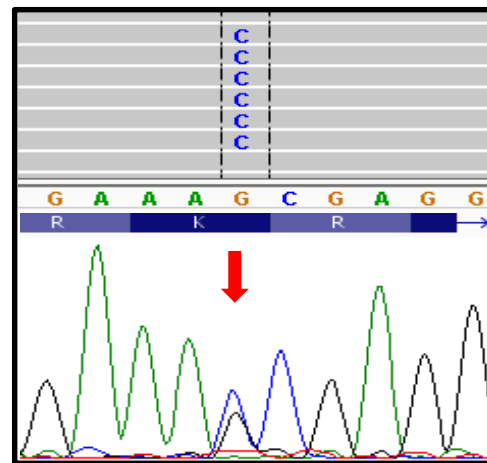

**56b.** Patient 13 in Supplemental Table 4.  
*RTEL1* c.1416G>C

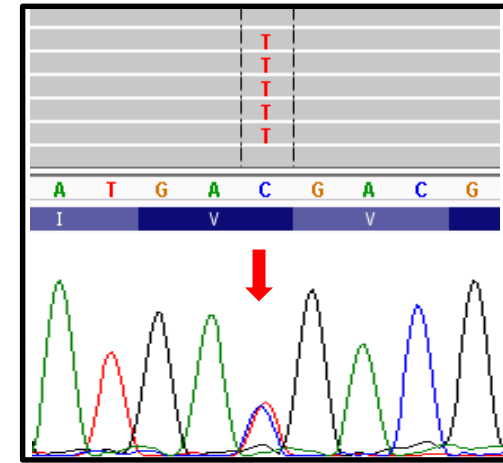

**57.** Patient 14 in Supplemental Table 4.  
*TERT* c.2371 G>A

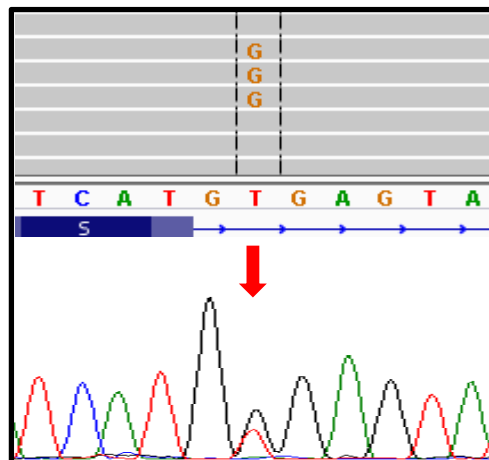

**58.** Patient 16 in Supplemental Table 4.  
*MASTL* c.811+2 T>G

Figure 59. A Venn diagram showing how many unclassified patients were added to the classified pool after being tested by the NGS gene panel assay (15), and how many patients whose diagnosis remained unclassified after being tested by the assay (68).

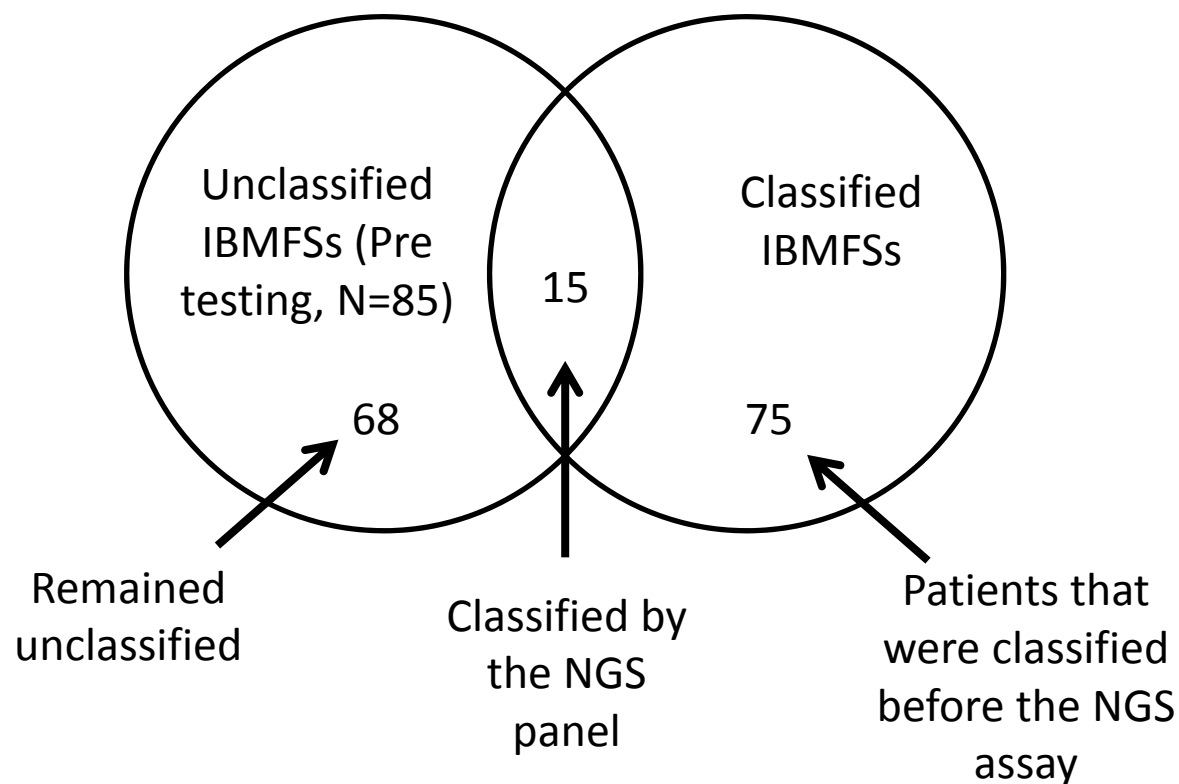

## **Supplementary Tables**

### **Improving diagnostic precision, care and syndrome definitions using comprehensive next generation sequencing for the inherited bone marrow failure syndromes**

Ibrahim Ghemlas, Hongbing Li, Bozana Zlateska, Robert Klaassen, Conrad V Fernandez, Rochelle A Yanofsky, John Wu, Yves Pastore, Mariana Silva, Jeff H Lipton, Josse Brossard, Michon Bruno, Sharon Abish, MaCregor Steele, Roona Sinha, Mark Belltrutti, Vicky Breaky, Lawrence Jardine, Lisa Goodyear, Lillian Sung, Santhosh Dhanraj, Emma Reble, Amanda Wagner, Joseph Beyene, Peter Ray, Stephen Meyn, Michaela Cada, Yigal Dror

**Supplementary Table 1: A list of 72 inherited bone marrow failure syndrome genes that were included in next generation sequencing panel assay and their coverage.** We designed a custom NGS IBMFS Gene Panel Assay that allows the discovery of mutations in a comprehensive panel of 72 known IBMFS genes. The assay is based on a hybridization oligonucleotide pool, which covers coding regions, 50bp flanking intronic regions that include splicing sites, 3'-untranslated regions that include potential translation regulatory elements, and upstream promoter regions. The oligonucleotide size was set at 150 mers for read length with 3x tiling and a maximum of 10bp overlap between oligonucleotides. The design was submitted to the Agilent HaloPlex Design Wizard program (<http://www.halogenomics.com/haloplex/custom-reagent-kits>).

| <b>Gene</b>         | <b>Regions</b> | <b>Coverage (%)</b> | <b>High Coverage (&gt;= 90%)</b> | <b>Low Coverage (&lt; 90%)</b> |
|---------------------|----------------|---------------------|----------------------------------|--------------------------------|
| <i>ABCB7</i>        | 15             | 100                 | 15                               | 0                              |
| <i>AK2</i>          | 11             | 100                 | 11                               | 0                              |
| <i>ALAS2</i>        | 12             | 100                 | 12                               | 0                              |
| <i>ANKRD26</i>      | 37             | 99.7                | 37                               | 0                              |
| <i>BTHS</i>         | 5              | 100                 | 5                                | 0                              |
| <i>CDAN1</i>        | 25             | 99.29               | 25                               | 0                              |
| <i>CTCI</i>         | 14             | 100                 | 14                               | 0                              |
| <i>CXCR4</i>        | 3              | 100                 | 3                                | 0                              |
| <i>DKCI</i>         | 14             | 100                 | 14                               | 0                              |
| <i>ELANE</i>        | 5              | 100                 | 5                                | 0                              |
| <i>FANCA</i>        | 35             | 98.61               | 34                               | 1                              |
| <i>FANCB/FAAP95</i> | 10             | 100                 | 10                               | 0                              |
| <i>FANCC</i>        | 21             | 100                 | 21                               | 0                              |
| <i>FANCD1/BRCA2</i> | 27             | 99.31               | 27                               | 0                              |
| <i>FANCD2</i>       | 45             | 97.15               | 40                               | 5                              |
| <i>FANCE</i>        | 10             | 100                 | 10                               | 0                              |
| <i>FANCF</i>        | 1              | 100                 | 1                                | 0                              |
| <i>FANCG</i>        | 11             | 100                 | 11                               | 0                              |
| <i>FANCI</i>        | 37             | 99.98               | 37                               | 0                              |
| <i>FANCJ/BRIP1</i>  | 24             | 98.09               | 23                               | 1                              |
| <i>FANCL</i>        | 14             | 100                 | 14                               | 0                              |
| <i>FANCM</i>        | 25             | 99.57               | 24                               | 1                              |
| <i>FANCO/RAD51C</i> | 11             | 100                 | 11                               | 0                              |
| <i>FANCP/PALB2</i>  | 14             | 99.69               | 14                               | 0                              |
| <i>FECH</i>         | 11             | 98.25               | 11                               | 1                              |
| <i>G6PC3</i>        | 37             | 100                 | 37                               | 0                              |
| <i>GATA1</i>        | 6              | 100                 | 6                                | 0                              |



---

|                 |    |       |    |   |
|-----------------|----|-------|----|---|
| <i>GATA2</i>    | 10 | 100   | 10 | 0 |
| <i>GFII</i>     | 10 | 98.98 | 10 | 0 |
| <i>GLRX5</i>    | 3  | 100   | 3  | 0 |
| <i>GP1BA</i>    | 2  | 100   | 2  | 0 |
| <i>HAX1</i>     | 3  | 100   | 3  | 0 |
| <i>HOXA11</i>   | 12 | 100   | 12 | 0 |
| <i>KLF1</i>     | 3  | 100   | 3  | 0 |
| <i>LIG4</i>     | 4  | 99.94 | 4  | 0 |
| <i>MASTL</i>    | 12 | 99.96 | 12 | 0 |
| <i>MPL</i>      | 12 | 98.17 | 12 | 0 |
| <i>MYH9</i>     | 46 | 99.97 | 46 | 0 |
| <i>NBEAL2</i>   | 34 | 99.93 | 34 | 0 |
| <i>NHP2</i>     | 3  | 100   | 3  | 0 |
| <i>NOP10</i>    | 2  | 98.81 | 2  | 0 |
| <i>PALB2</i>    | 15 | 100   | 15 | 0 |
| <i>PUS1</i>     | 5  | 100   | 5  | 0 |
| <i>RBM8A</i>    | 4  | 81.41 | 2  | 2 |
| <i>RMRP</i>     | 1  | 100   | 1  | 0 |
| <i>RPL11</i>    | 6  | 100   | 6  | 0 |
| <i>RPL27</i>    | 4  | 100   | 4  | 0 |
| <i>RPL35A</i>   | 7  | 99.24 | 7  | 0 |
| <i>RPL5</i>     | 7  | 99.44 | 7  | 0 |
| <i>RPS10</i>    | 7  | 100   | 7  | 0 |
| <i>RPS19</i>    | 6  | 100   | 6  | 0 |
| <i>RPS24</i>    | 8  | 100   | 8  | 0 |
| <i>RPS27</i>    | 2  | 100   | 2  | 0 |
| <i>RPS26</i>    | 3  | 99.34 | 3  | 0 |
| <i>RPS29</i>    | 4  | 94.86 | 4  | 0 |
| <i>RPS7</i>     | 2  | 96.87 | 2  | 0 |
| <i>RTEL1</i>    | 33 | 100   | 33 | 0 |
| <i>RUNX1</i>    | 26 | 99.34 | 26 | 0 |
| <i>SBDS</i>     | 5  | 90.61 | 2  | 3 |
| <i>SEC23B</i>   | 20 | 100   | 20 | 0 |
| <i>SLC19A2</i>  | 6  | 100   | 6  | 0 |
| <i>SLC25A38</i> | 8  | 100   | 8  | 0 |
| <i>SLC37A4</i>  | 2  | 100   | 2  | 0 |
| <i>SMARCA1</i>  | 21 | 95.97 | 20 | 1 |
| <i>SRP72</i>    | 17 | 99.16 | 17 | 0 |
| <i>TERC</i>     | 1  | 100   | 1  | 0 |
| <i>TERT</i>     | 16 | 100   | 16 | 0 |

---

|                              |    |       |    |   |
|------------------------------|----|-------|----|---|
| <b><i>TINF2</i></b>          | 3  | 94.86 | 2  | 1 |
| <b><i>USBI/ C16orf57</i></b> | 8  | 93.33 | 7  | 1 |
| <b><i>WAS</i></b>            | 11 | 99.57 | 11 | 0 |
| <b><i>WRAP53</i></b>         | 7  | 100   | 7  | 0 |
| <b><i>XRCC2</i></b>          | 4  | 95.62 | 4  | 0 |

\**FANCO/ERCC4* was identified as an IBMFS gene after January 2013, and was added to the panel when the second batch of patients was tested.

The gene list is modified and updated from Dror Y. Genetic Basis of Inherited Bone Marrow Failure Syndromes. InTech Open Access Publisher 2011: pp 357-392.

**Supplementary Table 2:** List of genes and mutation in previously genotyped patients which were validated with NGS IBMFS gene panel

| <b>Patient</b> | <b>Gene</b>           | <b>Nucleotide change</b> | <b>Protein change</b> | <b>Mutation type</b> |
|----------------|-----------------------|--------------------------|-----------------------|----------------------|
| <b>1*</b>      | <i>SBDS</i> (hom)     | c.258+2T>C               | Splicing              | Splicing             |
| <b>2</b>       | <i>RPL5</i> (het)     | c.83delC                 | p.Thr28Metfs*10       | Frameshift           |
| <b>3</b>       | <i>ELANE</i> (het)    | c.597+5 G>A              | Splicing              | Splicing             |
| <b>4</b>       | <i>FANCA</i> (het)    | c.3788-3790 delTCT       | p.F1263SFS*194        | Frameshift           |
| <b>5</b>       | <i>TINF2</i> (het)    | c. 845G>A                | R282H                 | Missense             |
| <b>6*</b>      | <i>cMPL</i> (hom)     | c.304C>T                 | R102C                 | Missense             |
| <b>7</b>       | <i>RPS19</i> (het)    | c.250_251delAG           | p.R84Lfs*69           | Frameshift           |
| <b>8*</b>      | <i>DKC1</i> (com hem) | c.112delA; c.116InsC     | I38S ; K39T           | Frameshift           |
| <b>9</b>       | <i>TERT</i> (het)     | c.2383-15C>T             | Splicing              | Splicing             |
| <b>10</b>      | <i>RPL11</i> (het)    | c.158-1G>C               | Splicing              | Splicing             |

\*Two different mutations that were present in one allele (combined mutations) or two identical mutations that were found in both alleles (homozygous mutations) were counted twice. Thus, the total number of mutations (*i.e.* mutant alleles) in these 10 patients is 13.

Com, two mutations combined on the same allele; hem, hemizygous; het, heterozygous; hom, homozygous; NA, not applicable

**Supplemental Table 3:** List of identified damaging mutations in patients with classified IBMFSs without known genes

| Number | Clinical Diagnosis | Gene                   | Mode | Nucleotide change                 | Protein change  | Mutation type    | Previous reporting |
|--------|--------------------|------------------------|------|-----------------------------------|-----------------|------------------|--------------------|
| 1      | DBA                | <i>RPS26</i> (het)     | AD   | c. 243delC                        | p.Ser81Argfs*3  | Indel/Frameshift | Novel <sup>2</sup> |
| 2      | DBA                | <i>RPS26</i> (het)     | AD   | c.1A>G                            | p.Met1?         | Start code lost  | Reported           |
| 3      | DBA                | <i>RPS26</i> (het)     | AD   | c.4-32_21<br>delGTTTTTCCTAAC<br>A | Splicing change | Splicing         | Novel <sup>2</sup> |
| 4      | DBA                | <i>RPS19</i> (het)     | AD   | c.10_13 delAGTT                   | p.Val4Leufs*2   | Indel/Frameshift | Reported           |
| 5      | DBA                | <i>RPS19</i> (het)     | AD   | c. 3G>T                           | p.Met1?         | Start code lost  | Reported           |
| 6      | DBA                | <i>RPL11</i> (het)     | AD   | c.60_61delCT                      | p.Cys21Serfs*33 | Indel/Frameshift | Reported           |
| 7      | DBA                | <i>RPL11</i> (het)     | AD   | c.60_61delCT                      | p.Cys21Serfs*33 | Indel/Frameshift | Reported           |
| 8      | DBA                | <i>RPS24</i> (het)     | AD   | c.1A>G                            | p.Met1?         | Start code lost  | Reported           |
| 9      | DBA                | <i>RPS24</i> (het)     | AD   | c.4-2A>G                          | Splicing change | Splicing         | Novel <sup>2</sup> |
| 10     | DBA                | <i>RPL35A</i><br>(het) | AD   | c.78_80delTCT                     | p. Leu28del     | Indel/Inframe    | Reported           |
| 11     | DBA                | <i>RPL11</i> (het)     | AD   | c.372C>G                          | p.Ile124Met     | Missense         | Novel <sup>2</sup> |
| 12     | DBA                | <i>RPS29</i> (het)     | AD   | c.63-3 C>A                        | Splicing change | Splicing         | Novel <sup>2</sup> |
| 13     | DBA                | <i>RPS19</i> (het)     | AD   | c.185G>A                          | p.Arg62Gln      | Missense         | Reported           |
| 14     | DBA                | <i>RPS19</i> (het)     | AD   | c.16delG                          | p.Val6*         | Nonsense         | Novel <sup>2</sup> |
| 15     | DBA                | <i>RPS7</i> (het)      | AD   | c.398T>C                          | p.Leu133Ser     | Missense         | Novel <sup>2</sup> |

|    |     |                            |    |                                                |                                 |                              |                                          |
|----|-----|----------------------------|----|------------------------------------------------|---------------------------------|------------------------------|------------------------------------------|
| 16 | DBA | <i>SBDS</i><br>(combined)  | AR | c.127G>T<br>c.258+2T>C                         | p.Val43Leu<br>Splicing change   | Missense<br>Splicing         | Novel <sup>2</sup><br>Reported           |
| 17 | FA  | <i>FANCE</i><br>(hom)      | AR | c. 1111C>T                                     | p.Arg371Trp                     | Missense                     | Reported                                 |
| 18 | FA  | <i>FANCA</i><br>(hom)      | AR | c.1115_1118delTTG<br>G                         | p.Val372Alafs*42                | Indel/Frameshift             | Reported                                 |
| 19 | FA  | <i>FANCA</i><br>(hom)      | AR | c.1645C>T                                      | p.Gln549*                       | Nonsense                     | Reported                                 |
| 20 | FA  | <i>FANCA</i><br>(combined) | AR | c.2851 C>T<br>c.1470G>A                        | p.Arg951Trp<br>p.Gln490Gln      | Missense<br>Splicing         | Reported<br>Reported                     |
| 21 | FA  | <i>FANCA</i><br>(hom)      | AR | c.2830_2831Ins<br>GAAATTCAACCTG<br>AAGCTG      | p.Asp944Glyfs*5                 | Indel/Frameshift             | Reported                                 |
| 22 | FA  | <i>BRIP1</i><br>(hom)      | AR | c.2392C>T                                      | p.Arg798*                       | Nonsense                     | Reported                                 |
| 23 | FA  | <i>BRIP1</i><br>(hom)      | AR | c.2392C>T                                      | p.Arg798*                       | Nonsense                     | Reported                                 |
| 24 | FA  | <i>ERCC4</i><br>(hom)      | AR | c.2065C>A                                      | p.Arg689Ser                     | Missense                     | Reported                                 |
| 25 | FA  | <i>TINF2</i> (het)         | AD | c.734C>A                                       | p.Ser245Tyr                     | Missense                     | Reported                                 |
| 26 | DC  | <i>RTEL1</i><br>(combined) | AR | c.49C>T<br>c.3442delC                          | p.Pro17Ser<br>p.Gln1148Argfs*96 | Missense<br>Indel/Frameshift | Novel <sup>2</sup><br>Novel <sup>2</sup> |
| 27 | DC  | <i>TERC</i><br>(combined)  | AD | n.37A>G<br>n.216_229del<br>GGCGGGTTCGCCT<br>GC | NA<br>NA                        | ncRNA<br>ncRNA               | Reported<br>Reported                     |

|    |     |                            |    |                          |                                    |                              |                                |
|----|-----|----------------------------|----|--------------------------|------------------------------------|------------------------------|--------------------------------|
| 28 | SCN | <i>ELANE</i><br>(het)      | AD | c.466T>G                 | p.Trp156Gly                        | Missense                     | Novel <sup>2</sup>             |
| 29 | SCN | <i>ELANE</i><br>(het)      | AD | c. 452G>C                | p.Cys151Ser                        | Missense                     | Novel <sup>2</sup>             |
| 30 | SCN | <i>ELANE</i><br>(het)      | AD | c.176 T>C                | p.Leu59Pro                         | Missense                     | Novel <sup>2</sup>             |
| 31 | CN  | <i>ELANE</i><br>(het)      | AD | c.377C>T                 | p.Ser126Leu                        | Missense                     | Reported                       |
| 32 | CN  | <i>ELANE</i><br>(het)      | AD | c.182C>T                 | p.Ala61Val                         | Missense                     | Reported                       |
| 33 | CN  | <i>ELANE</i><br>(het)      | AD | c.574_581dupGGCC<br>GGCA | p.Val197Argfs*18                   | Indel/Frameshift             | Novel <sup>2</sup>             |
| 34 | SCN | <i>HAXI</i><br>(hom)       | AR | c. 131InsA               | p.Trp44*                           | Nonsense                     | Reported                       |
| 35 | CDA | <i>CDANI</i><br>(combined) | AR | c.2015C>T<br>c.2081C>T   | p.Pro672Leu<br>p.Pro694Leu         | Missense<br>Missense         | Reported<br>Novel <sup>2</sup> |
| 36 | CDA | <i>CDANI</i><br>(combined) | AR | c.2015C>T<br>c.2081C>T   | p.Pro672Leu<br>p.Pro694Leu         | Missense<br>Missense         | Reported<br>Novel <sup>2</sup> |
| 37 | SDS | <i>SBDS</i><br>(combined)  | AR | c.120delG<br>c.258+2T>C  | p.Ser41Alafs*17<br>Splicing change | Indel/Frameshift<br>Splicing | Novel <sup>2</sup><br>Reported |
| 38 | FT  | <i>MYH9</i> (het)          | AD | c. 4562A>G               | p.His1521Arg                       | Missense                     | Novel <sup>2</sup>             |
| 39 | FT  | <i>ANKRD26</i><br>(het)    | AD | c.4976dupA               | p.Ile1659Tyrfs*3                   | Indel/Frameshift             | Novel <sup>2</sup>             |
| 40 | FT  | <i>TERT</i> (het)          | AD | c.2383-15T>C             | Splicing change                    | Splicing                     | Novel <sup>2</sup>             |
| 41 | FT  | <i>TERT</i> (het)          | AD | c.2383-15T>C             | Splicing change                    | Splicing                     | Novel <sup>2</sup>             |

|    |     |                           |    |                                           |                                                    |                                        |                      |
|----|-----|---------------------------|----|-------------------------------------------|----------------------------------------------------|----------------------------------------|----------------------|
| 42 | CSA | <i>SLC25A38</i><br>(hom)  | AR | c.560G>A                                  | p.Arg187Gln                                        | Missense                               | Novel <sup>2</sup>   |
| 43 | TAR | <i>RBM8A</i> <sup>1</sup> | AR | c. -21G>A/<br>Large deletion <sup>1</sup> | Reduced translation<br>Large deletion <sup>1</sup> | 5'- UTR<br>Large deletion <sup>1</sup> | Reported<br>Reported |
| 44 | TAR | <i>RBM8A</i> <sup>1</sup> | AR | c. -21G>A/<br>Large deletion <sup>1</sup> | Reduced translation<br>Large deletion <sup>1</sup> | 5'- UTR<br>Large deletion <sup>1</sup> | Reported<br>Reported |

AD, autosomal dominant; AR, autosomal recessive; CDA, congenital dyserythropoietic anemia; CSA, congenital sideroblastic anemia; CN, cyclic neutropenia; DBA, Diamond-Blackfan anemia; DC, Dyskeratosis congenita; FA, Fanconi anemia; FT, familial thrombocytopenia; ncRNA, non-coding RNA; SCN, severe congenital neutropenia; SDS, Shwachman–Diamond syndrome; TAR, Thrombocytopenia with Absent Radii

<sup>1</sup>Analysis of the NGS data by the SureCall CNV algorithm identified a large deletion on the allele without the mutation (Supplementary Fig 42, 43). This confirmed a compound heterozygosity state, which is the commonest genotype combination in this disease.

<sup>2</sup>See information in Supplementary Table 5 about damage prediction of this mutation. The criteria for calling a variant a novel/most likely damaging mutation are provided in Supplementary Table 5 and in the Methods Section (in the paragraph “Variant analysis and filtering strategy”).

**Supplementary Table 4:** List of patients with unclassified IBMFSs who were Genotyped and diagnosed based on this study.

| Number | Clinical phenotype                                                                                                                                                                                                                                                                                                                         | Gene                  | Nucleotide change | Protein change       | Mutation type    | Previous reporting | Diagnosis based on this study |
|--------|--------------------------------------------------------------------------------------------------------------------------------------------------------------------------------------------------------------------------------------------------------------------------------------------------------------------------------------------|-----------------------|-------------------|----------------------|------------------|--------------------|-------------------------------|
| 1      | Neutropenia, MDS, mother with neutropenia. Negative for <i>ELA2</i> mutations.                                                                                                                                                                                                                                                             | <i>GATA2</i><br>(het) | c.1009C>T         | p.Arg337*            | Nonsense         | Reported           | Familial MDS                  |
| 2      | Neutropenia, solitary kidney, maternal grandfather and granduncle with neutropenia and AML. Negative screens for FA, DC and mutations in common neutropenia genes.                                                                                                                                                                         | <i>WAS</i><br>(hemi)  | c.881T>C          | p.Ile294Thr          | Missense         | Reported           | SCN                           |
| 3      | Neutropenia, atrial septal defect, negative for mutations in common neutropenia genes.                                                                                                                                                                                                                                                     | <i>G6PC3</i><br>(hom) | c.911dupC         | p.Gln305Serfs*<br>82 | Indel/Frameshift | Novel <sup>1</sup> | SCN                           |
| 4      | Chronic pancytopenia from the age of 2 years; hypocellular bone marrow, brother with neutropenia and failure to thrive; short telomeres                                                                                                                                                                                                    | <i>TERT</i><br>(het)  | c.1234C>T         | p.His412Tyr          | Missense         | Reported           | DC                            |
| 5      | Pancytopenia from the age of 2.5 years. Decreased marrow cellularity, and reduced erythropoiesis and megakaryopoiesis. Red blood cell transfusion until the age of 18 years. Spontaneous elevation of chromosome fragility (stimulation with cross linking agents were not done), but repeat testing with mitomycin C and diepoxybutane in | <i>TERT</i><br>(het)  | c. 2014C>T        | p.Arg672Cys          | Missense         | Novel <sup>1</sup> | DC                            |



adulthood was normal. Telomere testing has not been done.

|           |                                                                                                                                                                                                                                             |                       |                    |                     |                  |                    |                        |
|-----------|---------------------------------------------------------------------------------------------------------------------------------------------------------------------------------------------------------------------------------------------|-----------------------|--------------------|---------------------|------------------|--------------------|------------------------|
| <b>6</b>  | Moderate to severe anemia, moderate neutropenia, mildly hypoplastic thumbs, developmental delay; semilobar holoprosencephaly; hypertonus and contractures; mildly hypocellular marrow, short telomeres, high eADA.                          | <i>TERT</i><br>(het)  | c. 2014C>T         | p.Arg672Cys         | Missense         | Novel <sup>1</sup> | DC                     |
| <b>7</b>  | Chronic moderate pancytopenia, hypocellular marrow; paternal grandmother with thrombocytopenia; short telomeres                                                                                                                             | <i>TERC</i><br>(het)  | n.83T>C            | NA                  | ncRNA            | Reported           | DC                     |
| <b>8</b>  | SAA, developmental delay, diabetes mellitus, pyloric stenosis, cerebral calcifications                                                                                                                                                      | <i>TINF2</i><br>(het) | c. 844C>G,         | p.Arg282Gly         | Missense         | Novel <sup>1</sup> | DC                     |
| <b>9</b>  | Severe neutropenia, anemia, thrombocytopenia; marrow active without dysplasia; reduced T & B lymphocytes, low IgG                                                                                                                           | <i>CXCR4</i><br>(het) | c.1000C>T          | p.Arg334*           | Missense         | Reported           | WHIM syndrome          |
| <b>10</b> | Hydrops fetalis, severe anemia that persisted, early moderate thrombocytopenia, intermittent neutropenia; marrow at the age 2 months showed increased cellularity, normal erythropoiesis, reduced granulopoiesis, reduced megakaryopoiesis, | <i>RPL5</i><br>(het)  | c.174_175delA<br>G | p.Arg58Argfs*<br>53 | Indel/Frameshift | Novel <sup>1</sup> | DBA                    |
| <b>11</b> | Congenital thrombocytopenia, persistent neutropenia, large platelets.                                                                                                                                                                       | <i>MYH9</i><br>(het)  | c.3493C>T          | p.Arg1165Cys        | Missense         | Reported           | MYH9- related disorder |

|           |                                                                                                                                    |                        |                        |                            |               |                                          |                                 |
|-----------|------------------------------------------------------------------------------------------------------------------------------------|------------------------|------------------------|----------------------------|---------------|------------------------------------------|---------------------------------|
| <b>12</b> | Thrombocytopenia and anemia from early childhood, arthritis and vasculitis (low T and B cells while on prednisone). Active marrow. | <i>WAS</i><br>(hemi)   | c.157_162delC<br>TGTAC | p.Leu53_Tyr54<br>del       | Indel/Inframe | Novel <sup>1</sup>                       | WAS                             |
| <b>13</b> | SAA; short telomeres; no response to IST                                                                                           | <i>RTEL1</i><br>(comb) | c.1373C>T<br>c.1416G>C | p.Thr458Met<br>p.Lys472Asn | Missense      | Novel <sup>1</sup><br>Novel <sup>1</sup> | DC                              |
| <b>14</b> | SAA; no response to IST                                                                                                            | <i>TERT</i><br>(het)   | c.2371G>A              | p.Val791Ile                | Missense      | Reported                                 | DC                              |
| <b>15</b> | SAA; no response to IST                                                                                                            | <i>MASTL</i><br>(het)  | c.811+2 T>G            | Splicing change            | Splicing      | Novel <sup>1</sup>                       | <i>MASTL</i> associate disorder |

AD, autosomal dominant; AR, autosomal recessive; DBA, Diamond Blackfan anemia; DC, Dyskeratosis congenita; eADA, adenosine deaminase; IgG, Immunoglobulin G ; IST, immunosuppressive therapy; MDS, myelodysplastic syndrome; ncRNA, non-coding RNA; SAA, severe aplastic anemia; SCN, severe congenital neutropenia; TL, telomere length ; WAS, Wiskott-Aldrich syndrome ; WHIM, Warts-Hypogamaglobulinemia-Infection-Myelokathexis.

<sup>1</sup>See information in Supplementary Table 5 about damage prediction of this mutation. The criteria for calling a variant a novel/most likely damaging mutation are provided in Supplementary Table 5 and in the Methods Section (in the paragraph “Variant analysis and filtering strategy”).

**Supplementary Table 5:** Bioinformatic data related to novel/most likely causal mutations. The table shows mutation information, as well as prediction of conservation and damaging effect of the mutations on protein by several different softwares. Variants were considered novel / most likely causal mutations if they fulfilled all the following: 1) they appeared in allelic dosage that was consistent with the known inheritance mode of the disease, 2) the MAF was <0.001, 3) evolutionary conserved amino acid/s are affected, 4) the variant was considered damaging by at least 2 of the following prediction software programs: PolyPhen2, SIFT/SIFT-Indel, Provean, MutationTaster and Human Splicing Finder. In this paper we referred to both, previously published mutations and novel mutations as “causal mutations”.

| Patient                                               | Gene         | Nucleotide change                | Protein change  | Mutation type        | MAF (EVS) | Conser-<br>vation <sup>1</sup> | MutationTaster <sup>2</sup> | Provean <sup>3</sup>   | Polyphen2 <sup>4</sup>          | SIFT <sup>5</sup> /<br>SIFT-<br>Indel | Human<br>Splicing<br>Finder                        |
|-------------------------------------------------------|--------------|----------------------------------|-----------------|----------------------|-----------|--------------------------------|-----------------------------|------------------------|---------------------------------|---------------------------------------|----------------------------------------------------|
| <b>1</b><br><b>(Patient 1</b><br><b>SuppTable 3)</b>  | <i>RPS26</i> | c. 243delC                       | p.Ser81Argfs*3  | Indel/<br>Frameshift | NR        | NA                             | Disease causing             | ID                     | ID                              | Damaging                              | NA                                                 |
| <b>2</b><br><b>(Patient 3</b><br><b>SuppTable 3)</b>  | <i>RPS26</i> | c.4-32_21<br>delGTTTTCCTA<br>ACA | Splicing change | Splicing             | NR        | NA                             | Splice site<br>changes      | ID                     | ID                              | ID                                    | Splicing<br>branch<br>point<br>broken <sup>9</sup> |
| <b>3</b><br><b>(Patient 14</b><br><b>SuppTable 3)</b> | <i>RPS19</i> | c.16delG                         | p.Val6*         | Indel/<br>Nonsense   | NR        | NA                             | Disease causing             | ID                     | ID                              | Damaging                              | NA                                                 |
| <b>4</b><br><b>(Patient 10</b><br><b>SuppTable 4)</b> | <i>RPL5</i>  | c.174_175delAG                   | p.Arg58Argfs*53 | Indel/<br>Frameshift | NR        | NA                             | Disease causing             | ID                     | ID                              | Damaging                              | NA                                                 |
| <b>5</b><br><b>(Patient 11</b><br><b>SuppTable 3)</b> | <i>RPL11</i> | c.372C>G                         | p.Ile124Met     | Missense             | NR        | 5.94                           | Disease causing             | Deleterious<br>(-2.60) | Probably<br>damaging<br>(0.944) | Intolerant<br>(0)                     | NA                                                 |
| <b>6</b><br><b>(Patient 9</b><br><b>SuppTable 3)</b>  | <i>RPS24</i> | c.4-2A>G                         | Splicing change | Splicing             | NR        | NA                             | Disease causing             | ID                     | ID                              | ID                                    | Site<br>broken                                     |
| <b>7</b><br><b>(Patient 12</b><br><b>SuppTable 3)</b> | <i>RPS29</i> | c.63-3 C>A                       | Splicing change | Splicing             | NR        | NA                             | Disease causing             | ID                     | ID                              | ID                                    | Site<br>broken                                     |

|                                            |              |                           |                       |                      |          |      |                                                      |                         |                                 |                       |                                                                  |
|--------------------------------------------|--------------|---------------------------|-----------------------|----------------------|----------|------|------------------------------------------------------|-------------------------|---------------------------------|-----------------------|------------------------------------------------------------------|
| <b>8<br/>(Patient 15<br/>SuppTable 3)</b>  | <i>RPS7</i>  | c.398T>C                  | p.Leu133Ser           | Missense             | NR       | 4.6  | Disease causing                                      | Deleterious<br>(-5.462) | Probably<br>damaging<br>(0.99)  | Intolerant<br>(0.01)  | NA                                                               |
| <b>9<br/>(Patient 40<br/>SuppTable 3)</b>  | <i>TERT</i>  | c.2383-15T>C <sup>6</sup> | Splicing change       | Splicing             | 0.0005   | NA   | Splice site<br>changes                               | ID                      | ID                              | ID                    | Site<br>broken                                                   |
| <b>10<br/>(Patient 5<br/>SuppTable 4)</b>  | <i>TERT</i>  | c. 2014C>T <sup>7</sup>   | p.Arg672Cys           | Missense             | 0.000082 | 4.67 | Protein might be<br>affected                         | Deleterious<br>(-3.317) | Probably<br>damaging<br>(0.99)  | Intolerant<br>(0.022) | NA                                                               |
| <b>11<br/>(Patient 6<br/>SuppTable 4)</b>  | <i>TERT</i>  | c. 2014C>T <sup>7</sup>   | p.Arg672Cys           | Missense             | 0.000082 | 4.67 | Protein might be<br>affected                         | Deleterious<br>(-3.317) | Probably<br>damaging<br>(0.99)  | Intolerant<br>(0.022) | NA                                                               |
| <b>12<br/>(Patient 26<br/>SuppTable 3)</b> | <i>RTEL1</i> | c.3442delC                | p.Gln1148Argfs<br>*96 | Indel/<br>Frameshift | NR       | NA   | Disease causing                                      | ID                      | ID                              | Damaging              | NA                                                               |
|                                            |              | c.49C>T                   | p.Pro17Ser            | Missense             | NR       | 4.86 | Disease causing                                      | Deleterious<br>(-6.73)  | Probably<br>damaging<br>(0.998) | Intolerant<br>(0.02)  | NA                                                               |
| <b>13<br/>(Patient 13<br/>SuppTable 4)</b> | <i>RTEL1</i> | c.1416G>C                 | p.Lys472Asn           | Missense             | NR       | 4.5  | Disease causing                                      | Deleterious<br>(-2.94)  | Probably<br>benign<br>(0.094)   | Tolerated<br>(0.076)  | NA                                                               |
|                                            |              | c.1373C>T                 | p.Thr458Met           | Missense             | 0.000539 | 4.34 | Splice site<br>changes; Protein<br>might be affected | Neutral<br>(-1.29)      | Probably<br>damaging<br>(0.98)  | Intolerant<br>(0.05)  | ESE site<br>is<br>broken,<br>and<br>Creates<br>a new<br>ESS site |
| <b>14<br/>(Patient 8<br/>SuppTable 4)</b>  | <i>TINF2</i> | c. 844C>G,                | p.Arg282Gly           | Missense             | NR       | 5.16 | Disease causing                                      | Deleterious<br>(-3.60)  | Possibly<br>damaging<br>(0.839) | Intolerant<br>(0.000) | NA                                                               |

|                                            |                      |                          |                      |                      |          |      |                 |                         |                                 |                       |                |
|--------------------------------------------|----------------------|--------------------------|----------------------|----------------------|----------|------|-----------------|-------------------------|---------------------------------|-----------------------|----------------|
| <b>15<br/>(Patient 16<br/>SuppTable 3)</b> | <i>SBDS</i>          | c.127G>T                 | p.Val43Leu           | Missense             | NR       | 5.19 | Disease causing | Neutral<br>(-1.632)     | Probably<br>benign<br>(0.005)   | Tolerated<br>(0.12)   | Site<br>broken |
| <b>16<br/>(Patient 37<br/>SuppTable 3)</b> | <i>SBDS</i>          | c.120delG                | p.Ser41AlaFs*17      | Indel/<br>Frameshift | NR       | NA   | Disease causing | ID                      | ID                              | Damaging              | NA             |
| <b>17<br/>(Patient 28<br/>SuppTable 3)</b> | <i>ELANE</i>         | c.466T>G                 | p.Trp156Gly          | Missense             | NR       | 4.42 | Disease causing | Deleterious<br>(-11.79) | Probably<br>damaging<br>(0.999) | Intolerant<br>(0.006) | NA             |
| <b>18<br/>(Patient 29<br/>SuppTable 3)</b> | <i>ELANE</i>         | c.452G>C                 | p.Cys151Ser          | Missense             | NR       | 4.42 | Disease causing | Deleterious<br>(-9.55)  | Probably<br>damaging<br>(1.0)   | Intolerant<br>(0.000) | NA             |
| <b>19<br/>(Patient 30<br/>SuppTable 3)</b> | <i>ELANE</i>         | c.176 T>C                | p.Leu59Pro           | Missense             | NR       | 3.24 | Disease causing | Deleterious<br>(-6.51)  | Probably<br>damaging<br>(1.0)   | Intolerant<br>(0.000) | NA             |
| <b>20<br/>(Patient 33<br/>SuppTable 3)</b> | <i>ELANE</i>         | c.574_581dupGG<br>CCGGCA | p.Val197Argfs<br>*18 | Indel/<br>Frameshift | NR       | NA   | Disease causing | ID                      | ID                              | Damaging              | NA             |
| <b>21<br/>(Patient 3<br/>SuppTable 4)</b>  | <i>G6PC3</i>         | c.911dupC                | p.Gln305Serfs<br>*82 | Indel/<br>Frameshift | NR       | NA   | Disease causing | ID                      | ID                              | Damaging              | NA             |
| <b>22<br/>(Patient 35<br/>SuppTable 3)</b> | <i>CDANI</i>         | c.2081C>T <sup>8</sup>   | p.Pro694Leu          | Missense             | NR       | 5.77 | Disease causing | Deleterious<br>(-9.02)  | Probably<br>damaging<br>(0.999) | Intolerant<br>(0.003) | NA             |
| <b>23<br/>(Patient 36<br/>SuppTable 3)</b> | <i>CDANI</i>         | c.2081C>T <sup>8</sup>   | p.Pro694Leu          | Missense             | NR       | 5.77 | Disease causing | Deleterious<br>(-9.02)  | Probably<br>damaging<br>(0.999) | Intolerant<br>(0.003) | NA             |
| <b>24<br/>(Patient 41<br/>SuppTable 3)</b> | <i>SLC25A<br/>38</i> | c.560G>A                 | p.Arg187Gln          | Missense             | 0.000077 | 4.89 | Disease causing | Deleterious<br>(-3.78)  | Probably<br>damaging<br>(0.999) | Intolerant<br>(0.02)  | NA             |

|                                          |                    |                        |                      |                      |    |      |                              |                          |                               |                      |             |
|------------------------------------------|--------------------|------------------------|----------------------|----------------------|----|------|------------------------------|--------------------------|-------------------------------|----------------------|-------------|
| <b>25</b><br>(Patient 15<br>SuppTable 4) | <i>MASTL</i>       | c.811+2 T>G            | Splicing change      | Splicing             | NR | 5.82 | Disease causing              | ID                       | ID                            | ID                   | Site broken |
| <b>26</b><br>(Patient 39<br>SuppTable 3) | <i>ANKRD</i><br>26 | c.4976dupA             | p.Ile1659Tyrfs*3     | Indel/<br>Frameshift | NR | NA   | Disease causing              | ID                       | ID                            | Damaging             | NA          |
| <b>27</b><br>(Patient 38<br>SuppTable 3) | <i>MYH9</i>        | c. 4562A>G             | p.His1521Arg         | Missense             | NR | 5.25 | Disease causing              | Deleterious<br>(-6.53)   | Probably<br>damaging<br>(1.0) | Intolerant<br>(0.01) | NA          |
| <b>28</b><br>(Patient 12<br>SuppTable 4) | <i>WAS</i>         | c.157_162delCT<br>GTAC | p.Leu53_Tyr54de<br>1 | Indel/<br>Inframe    | NR | NA   | Protein might be<br>affected | Deleterious<br>(-10.896) | ID                            | Damaging             | NA          |

<sup>1</sup>The MasterTaster software program evaluates the effect of variants on both, protein function/structure as well as on splicing.

<sup>2</sup>Conservation ranges from -12.3 to +6.17, with +6.17 being the most conserved.

<sup>3</sup>Provean scores: deleterious <-2.50; neutral >-2.50

<sup>4</sup>PolyPhen 2 scores: probably damaging (>0.85-1); possibly damaging (>0.15-0.84); probably benign (< 0.14)

<sup>5</sup>SIFT scores: intolerant (0.00-0.05); potentially intolerant (0.051-0.10); borderline (0.101-0.20), or tolerant (0.201-1.00)

<sup>6,7,8</sup>Patients have recurrent mutations in this study. <sup>6</sup>The same mutation was found in another patient in our registry who had aplastic anemia and very short telomeres and responded to androgen therapy. This mutation was used for validation of the NGS assay (Supplementary Table 2, Patient 9).

<sup>9</sup>The deleted fragment GTTTTCTAACA contains the only YURAC splicing branch point consensus sequence in intron 1 of *RPS26*, which in this case it is CTAAC. Splicing branch points are typically located 20-50 nucleotide upstream of the acceptor site, similar to the present sequence. Deletion of the branch point abolishes binding of splicing factor 1 and assembly of the spliceosome.

ESE, exonic splicing enhancer; ESS, Exonic splicing silencer; EVS, exome variant server database (<http://evs.gs.washington.edu/EVS/>). MAF in other databases was analyzed as indicated in Table 1, but not provided herein; ID, indeterminate by the software; MAF, minor allele frequency; NA, not applicable; NR, not reported in this database; SuppTable, Supplementary Table.
